# Supplementary material
Source: publisher site journal article supplement (https://www.dovepress.com/article/414015)
Supplement: Supplementary file 1 [file get_supplementary_file.php]

**Supplementary Material 1. Study inclusion and exclusion criteria**

For inclusion into the study, patients were required to fulfill all of the following criteria:

1. Age ≥ 18 years.
2. POAG or OHT with IOP treated and adequately controlled (IOP ≤ 18 mm Hg) with latanoprost 0.005% ophthalmic solution monotherapy for at least 4 weeks before screening.
3. Each eye being treated with latanoprost 0.005% ophthalmic solution monotherapy was to have had mean IOP ≤ 18 mm Hg at screening and mean IOP ≤ 28 mm Hg at baseline; measurements were to be taken at each visit at 8 AM, 10 AM, and 4 PM (each ± 30 minutes) with AM measurements of IOP at least 2 hours apart. If only one eye qualified but both eyes had glaucoma and the contralateral eye required antiglaucoma medications other than latanoprost, the patient did not qualify for the trial.
4. Stable VF, defined as no sign of VF degradation between two consecutive 30-2 or two consecutive 24-2 VF examinations. For patients with no VF defect (e.g., those with OHT), a single normal VF examination performed
   < 6 months before the screening visit was allowed to determine eligibility. For patients who had an abnormal VF examination, the following criteria applied:
   - Two VFs (most recent VF and past VF) examinations performed at least ≥ 6 months and ≤ 18 months apart were to be compared;
   - The most recent VF examination should have been performed < 6 months before the screening visit;
   - The past VF examination should have been performed ≥ 6 months and ≤ 18 months before the most recent VF examination.
5. Stable corrected Snellen visual acuity (VA) of better than 20/200 in the study eye. Patients had to see ≥ 50% of the letters on a single line to accept that VA line.
6. Central corneal thickness 480 to 620 μm in the study eye.
7. Shaffer gonioscopic grade of ≥ 3 (in at least 3 quadrants) in both eyes.
8. Female patients were required to be 1-year postmenopausal, surgically sterilized, or have a negative urine pregnancy test at screening. Women of childbearing potential were to use an acceptable form of contraception throughout the study. Acceptable methods included the use of at least one of the following: intrauterine (intrauterine device), hormonal (oral, injection, patch, implant, ring), barrier with spermicide (condom, diaphragm), or abstinence.

All patients were required to provide signed written consent before participation in any study-related procedures.

**Exclusion criteria**

Any of the following was regarded as a criterion for exclusion from the study: In the study eye:

1. A mean deviation of < -20 dB on VF examination.
2. A mean IOP > 28 mm Hg at baseline.
3. Presence of a scotoma within 5° of fixation on VF examination.
4. Aphakia.
5. Use of any antiglaucoma medication in addition to latanoprost 0.005% ophthalmic solution within 2 weeks before screening and any antiglaucoma medication (other than latanoprost) during the study period other than the randomized study medication.
6. Use of any topical ophthalmic steroid within 2 weeks before baseline. A short course of oral steroids was acceptable if the course was completed > 2 weeks before screening. Inhaled and intranasal steroids were acceptable.
7. Use of topical nonsteroidal anti-inflammatory drug within 2 weeks before baseline.
8. Use of any ophthalmic medications during the study period (nonpreserved artificial tears were allowed).
9. Ocular surgery or laser treatment of any kind in the study eye within 3 months before baseline.
10. History of ocular allergy/inflammation and/or severe blepharitis and/or uveitis. Seasonal allergic conjunctivitis was acceptable (as long as the patient was not expected to experience seasonal flare-up during the study period). Mild blepharitis/blepharoconjunctivitis, typically associated with prostaglandin usage, on the lid was acceptable.
11. History of ocular trauma or ocular infection within 3 months of screening.
12. History of herpes simplex keratitis.
13. Current proliferative diabetic retinopathy or age-related macular degeneration, unless deemed not clinically significant by the investigator.
14. Severe dry eye (e.g., clinically relevant superficial punctate keratitis, epithelial erosions of the cornea, and/or use of dry eye medication [including artificial tears] with a frequency exceeding 8 instillations per day).
15. Contact lens wear during the study period. Contact lens wear in an untreated contralateral eye was allowed.
16. Any secondary glaucoma or OHT (e.g., congenital glaucoma, closed-angle glaucoma, uveitic glaucoma, or pseudoexfoliation syndrome).
17. Any severe glaucoma defined by cupping (cup-to-disc ratio ≥ 0.8).
18. Any nonlaser glaucoma surgery.
19. Any abnormality preventing accurate assessment (e.g., resulting in unreliable applanation tonometry or VF examination).

General:

1. Pregnancy or lactation.
2. Uncontrolled asthma (defined as asthma that did not respond to the maximum guideline-directed therapy).
3. Allergy to BAK.
4. History of moderate or severe renal or hepatic impairment.
5. Participation in any study of an investigational product within 30 days before screening or at any time during the study period.

**Supplementary Table 1**: Overall Summary of TEAEs (Safety Population).

| **Type of TEAE** | No. (%) of patients | |
| --- | --- | --- |
| **T2345** | **BPL** |
| **(N = 165)** | **(N = 169)** |
| Any TEAEs | 42 (25.5) | 52 (30.8) |
| Any ocular TEAEs* | 23 (13.9) | 38 (22.5) |
| Maximum intensity |  |  |
| Mild | 28 (17.0) | 33 (19.5) |
| Moderate | 13 (7.9) | 16 (9.5) |
| Severe | 1 (0.6) | 3 (1.8) |
| Maximum relationship to study drug |  |  |
| Not suspected | 33 (20.0) | 32 (18.9) |
| Suspected | 9 (5.5) | 20 (11.8) |
| Any TEAEs leading to interruption of study medication | 1 (0.6) | 2 (1.2) |
| Any TEAEs leading to permanent discontinuation of study medication | 1 (0.6) | 3 (1.8) |
| Any SAEs | 1 (0.6) | 4 (2.4) |
| Death | 0 | 1 (0.6) |
| Any TEAEs in the study eye | 19 (11.5) | 31 (18.3) |

*This analysis includes ocular TEAEs reported in the study eye, treated fellow eye, and untreated fellow eye.

Abbreviations: SAE, serious adverse event; TEAE, treatment-emergent adverse event. This analysis includes ocular TEAEs reported in the study eye, treated fellow eye, and untreated fellow eye.

**Supplementary Table** **2**: Ocular TEAEs in the safety population.

|  | **T2345** | **BPL** |
| --- | --- | --- |
|  | (n=165) | (n=169) |
| Total ocular TEAEs recorded | 34 in 23 patients (13.9%) | 56 in 38 patients (22.5%) |
|  | n (%) | n (%) |
| Instillation site pain | 3 (1.8) | 8 (4.7) |
| Conjunctival hyperemia | 3 (1.8) | 4 (2.4) |
| Blepharitis | 2 (1.2) | 5 (3.0) |
| Instillation site pruritus | 2 (1.2) | 1 (0.6) |
| Punctate keratitis | 1 (0.6) | 5 (3.0) |
| Instillation site abnormal sensation | 1 (0.6) | 2 (1.2) |
| Vitreous detachment | 1 (0.6) | 2 (1.2) |
| Conjunctival disorder | 1 (0.6) | 1 (0.6) |
| Dry eye | 1 (0.6) | 1 (0.6) |
| Eye pruritus | 1 (0.6) | 1 (0.6) |
| Abnormal visual field tests | 1 (0.6) | 1 (0.6) |
| Chalazion | 1 (0.6) | – |
| Conjunctival edema | 1 (0.6) | – |
| Conjunctival follicles | 1 (0.6) | – |
| Conjunctivitis | 1 (0.6) | – |
| Corneal disorder | 1 (0.6) | – |
| Ectropion | 1 (0.6) | – |
| Eye allergy | 1 (0.6) | – |
| Eye color change | 1 (0.6) | – |
| Foreign body sensation in eyes | 1 (0.6) | 1 (0.6) |
| Instillation site foreign body sensations | 1 (0.6) | – |
| Instillation site lacrimation | 1 (0.6) | – |
| Lacrimation increased | 1 (0.6) | – |
| Meibomianitis | 1 (0.6) | – |
| Ocular hyperemia | 1 (0.6) | – |
| Vision blurred | 1 (0.6) | – |
| Vital dye staining cornea present | 1 (0.6) | – |
| Conjunctival cyst | – | 2 (1.2) |
| Conjunctival hemorrhage | – | 2 (1.2) |
| Allergic conjunctivitis | – | 2 (1.2) |
| Instillation site complication | – | 2 (1.2) |
| Conjunctival deposit | – | 1 (0.6) |
| Corneal abrasion | – | 1 (0.6) |
| Erythema of eyelid | – | 1 (0.6) |
| Eye irritation | – | 1 (0.6) |
| Eye pain | – | 1 (0.6) |
| Eyelid margin crusting | – | 1 (0.6) |
| Glaucoma | – | 1 (0.6) |
| Herpes zoster ophthalmic | – | 1 (0.6) |
| Instillation site dryness | – | 1 (0.6) |
| Instillation site erythema | – | 1 (0.6) |
| Lenticular opacities | – | 1 (0.6) |
| Papilloma conjunctival | – | 1 (0.6) |
| Photophobia | – | 1 (0.6) |
| Pseudoexfoliation syndrome | – | 1 (0.6) |
| Retinal degeneration | – | 1 (0.6) |

Abbreviations: BAK, benzalkonium chloride; BPL, BAK-preserved latanoprost 0.005%; T2345, preservative-free single-dose latanoprost 0.005%.
